# Supplementary material for: The coenzyme thiamine diphosphate displays a daily rhythm in the Arabidopsis nucleus
Source: PubMed Central journal article supplement (PMC7200797; doi:10.1038/s42003-020-0927-z), 2020-05-05
Supplement: 42003_2020_927_MOESM1_ESM.pdf [file 42003_2020_927_MOESM1_ESM.pdf]

## Supplementary Figures

# Supplementary Figure 1a

*thiC* mutant  
*thiC* 1.5 μM thiamine:*thiC* no thiamine

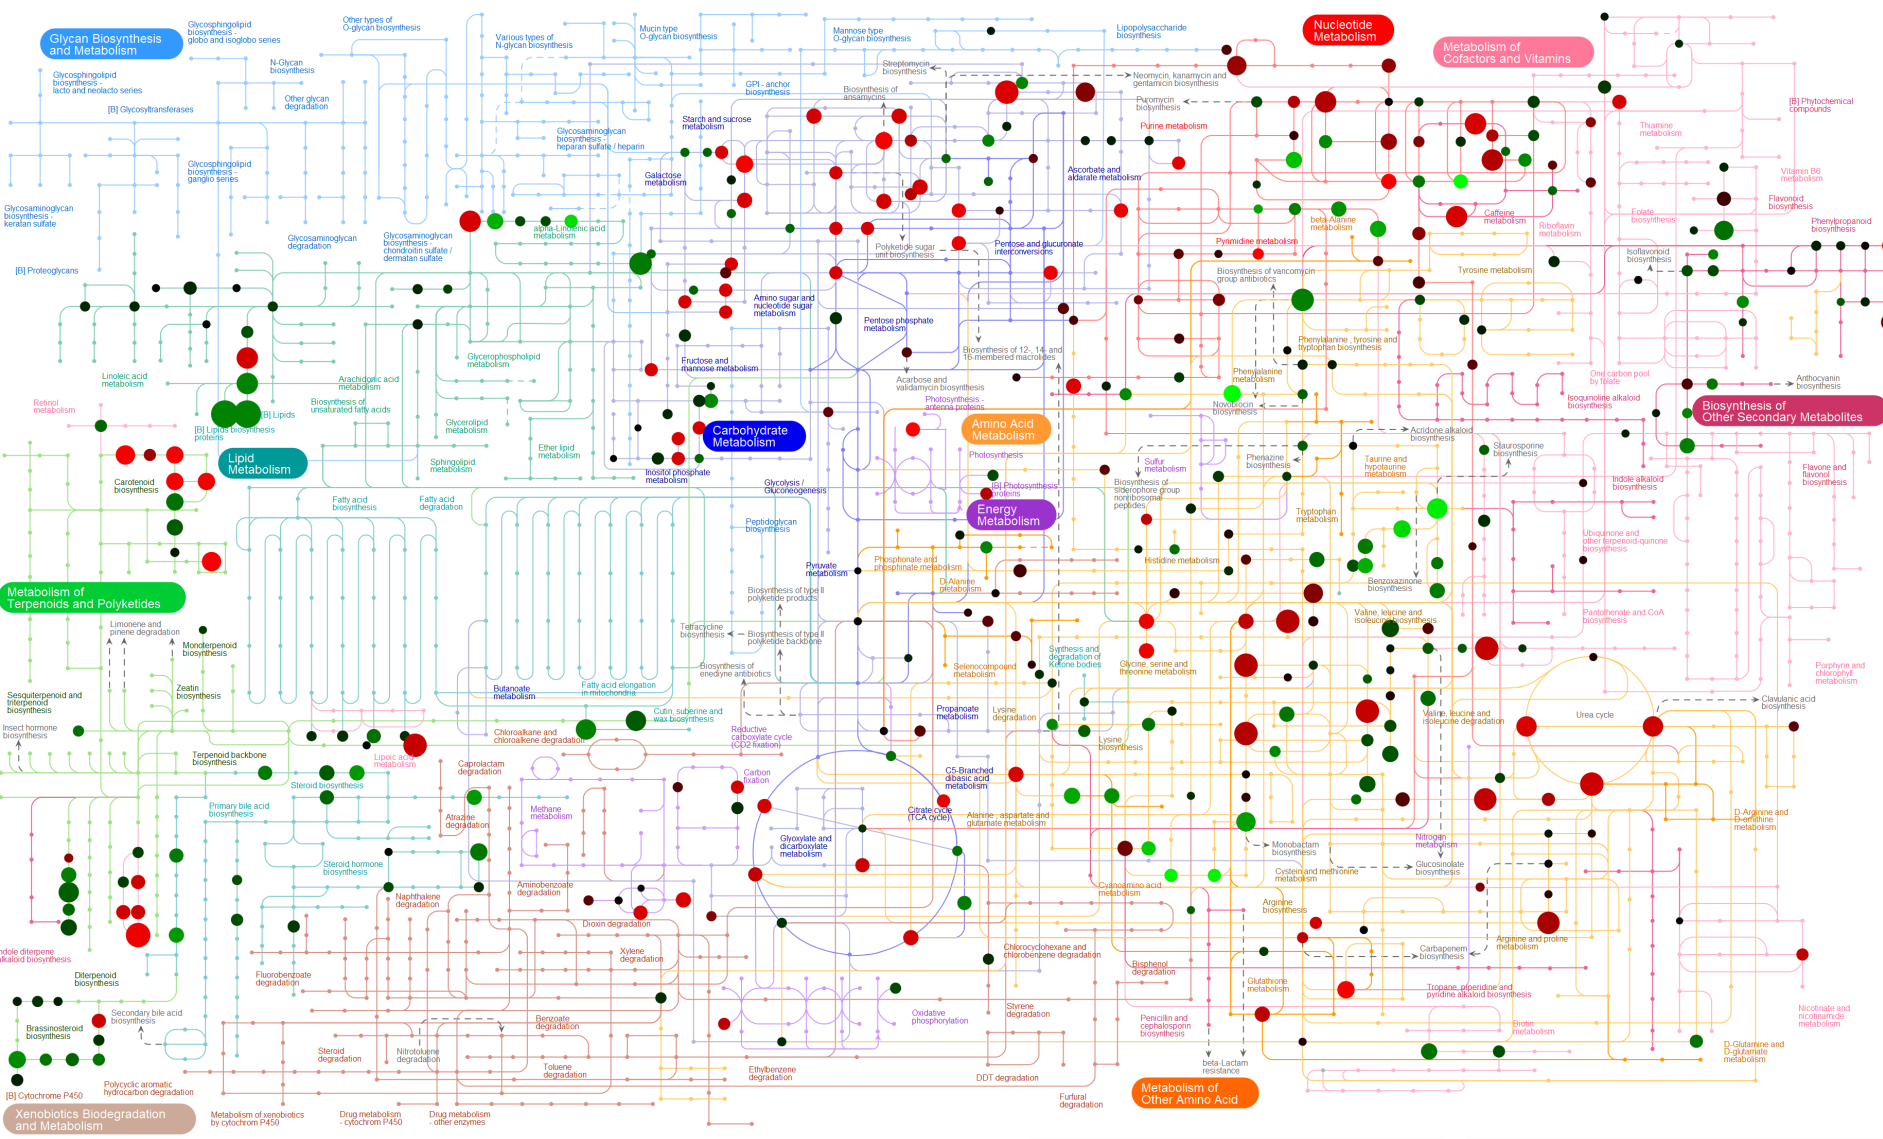

p-value [-log10] 0 ◯ 6 log2(Fold change) -2 ◯ 2

# Supplementary Figure 1b

Wild type  
Col-0 1.5 μM thiamine:Col-0 no thiamine

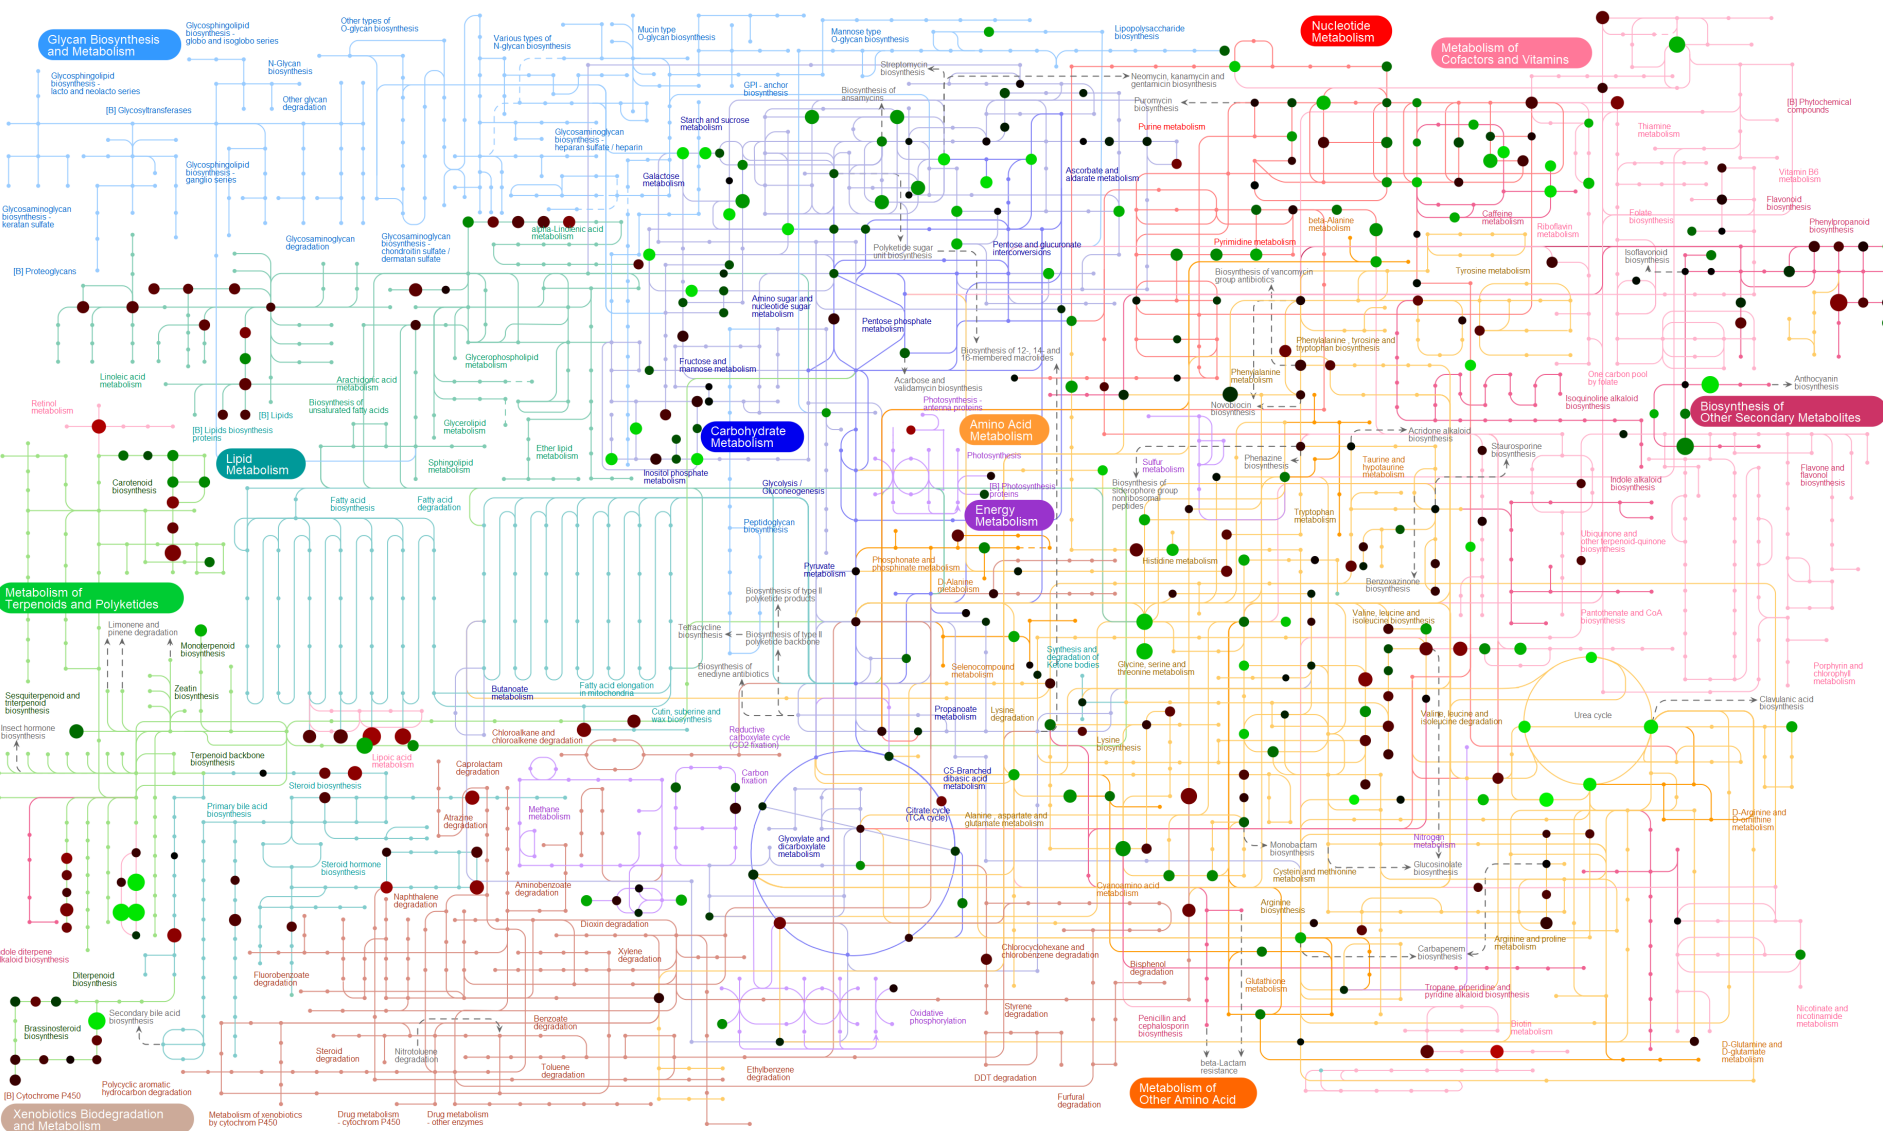

p-value [-log10] 0 ◯ 6 log2(Fold change) -2 ◯ 2

Relative changes in metabolite levels in the Arabidopsis mutant *thiC* (a) or wild type (b) plants upon supplementation with 1.5 uM thiamine. Polar metabolite extracts were analysed by non-targeted metabolomics. Peaks were putatively associated to chemical formulas and metabolites by accurate mass and isotopic patterns. Dot size indicates statistical significance obtained by a two-tailed heteroscedastic *t*-test adjusted for multiple hypothesis testing by the Benjamini-Hochberg procedure. Dot colour indicates the log<sub>2</sub> transformed fold-change of the means of either thiamine-supplemented or control plants. Red dots indicate metabolites that are higher in the presence of thiamine. In the *thiC* mutant, thiamine supplementation causes a drastic increase of metabolites all over primary metabolism.

## Supplementary Figure 2

**a**

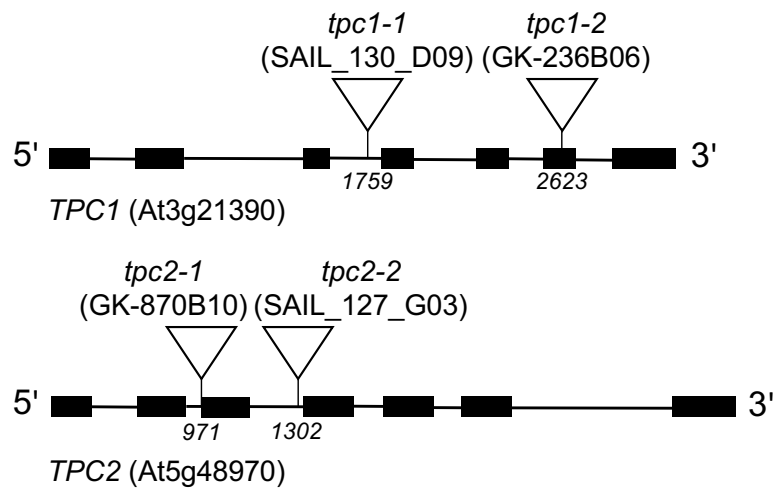

**b**

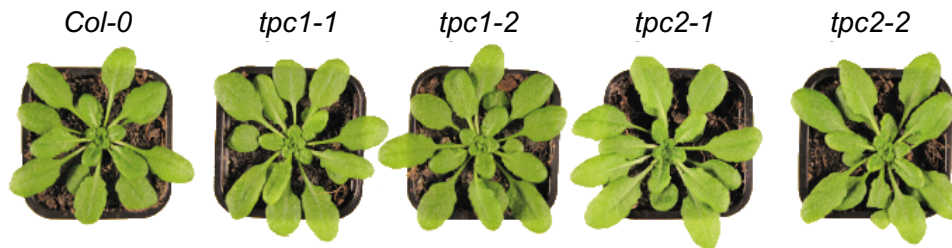

**c**

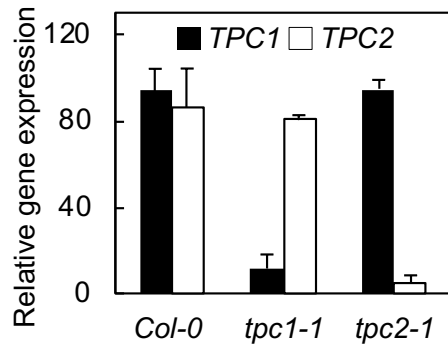

**d**

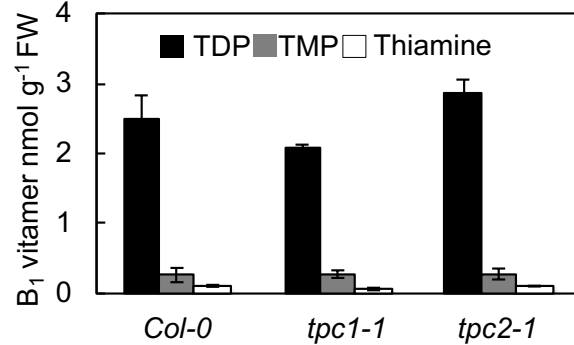

**e**

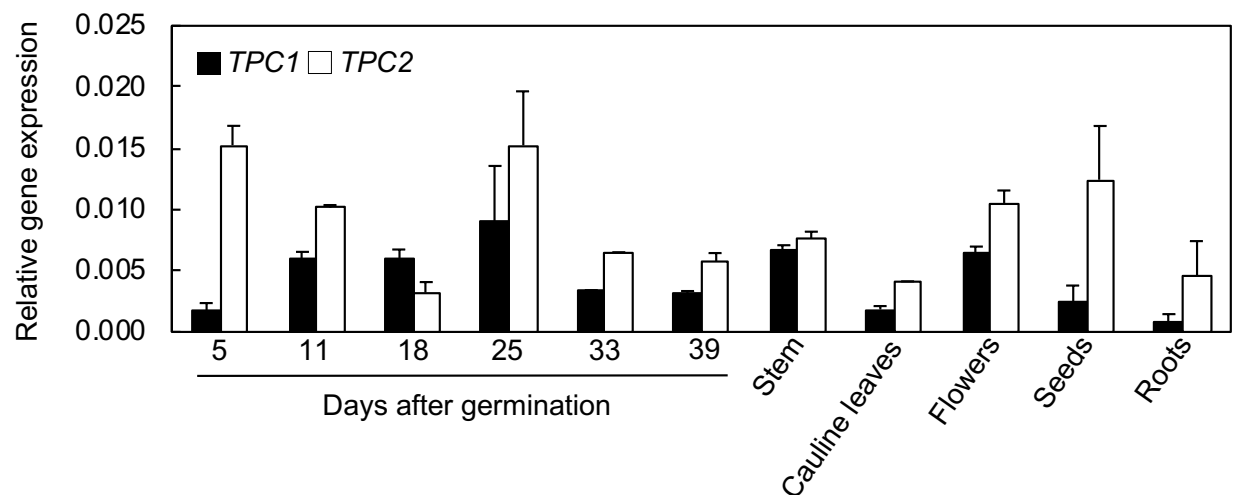

*TPC1* and *TPC2* are redundant in Arabidopsis. **a**, Gene models of *TPC1* and *TPC2* with exons depicted as black bars and introns as lines. The location of the T-DNA insertion in SAIL\_130\_D09 (*tpc1-1*), GK-236B06 (*tpc1-2*), GK-870B10 (*tpc2-1*) and SAIL\_127\_G03 (*tpc2-2*) are as depicted and were confirmed by genotyping and sequencing. **b**, Representative photographs of 21-day old *tpc* lines compared to wild-type (Col-0), showing no morphological defects during leaf development. **c**, Quantitative analysis of *TPC1* or *TPC2* expression in mutant lines relative to wild type (Col-0) from rosette leaves of 21-day old plants. The data are the average of three independent biological replicates with error bars representing SD. **d**, Thiamine, thiamine monophosphate (TMP) or thiamine diphosphate (TDP) content of lines as indicated, as determined by HPLC from rosette leaves of 21-day old plants. No statistically significant differences were observed for any of the vitamers across the lines. **e**, Tissue expression analysis of *TPC1* and *TPC2* transcript levels by quantitative real-time RT-PCR relative to *ubiquitin carrier protein 21* (*UBC21*, At5g53300). Error bars represent the SD of three biological replicates with three technical repeats. In all cases, plants were grown on soil under a 16-hour photoperiod (120  $\mu\text{mol photons}\cdot\text{m}^{-2}\text{ s}^{-1}$ ) at 22°C and 8 hours of darkness at 18°C.

### Supplementary Figure 3

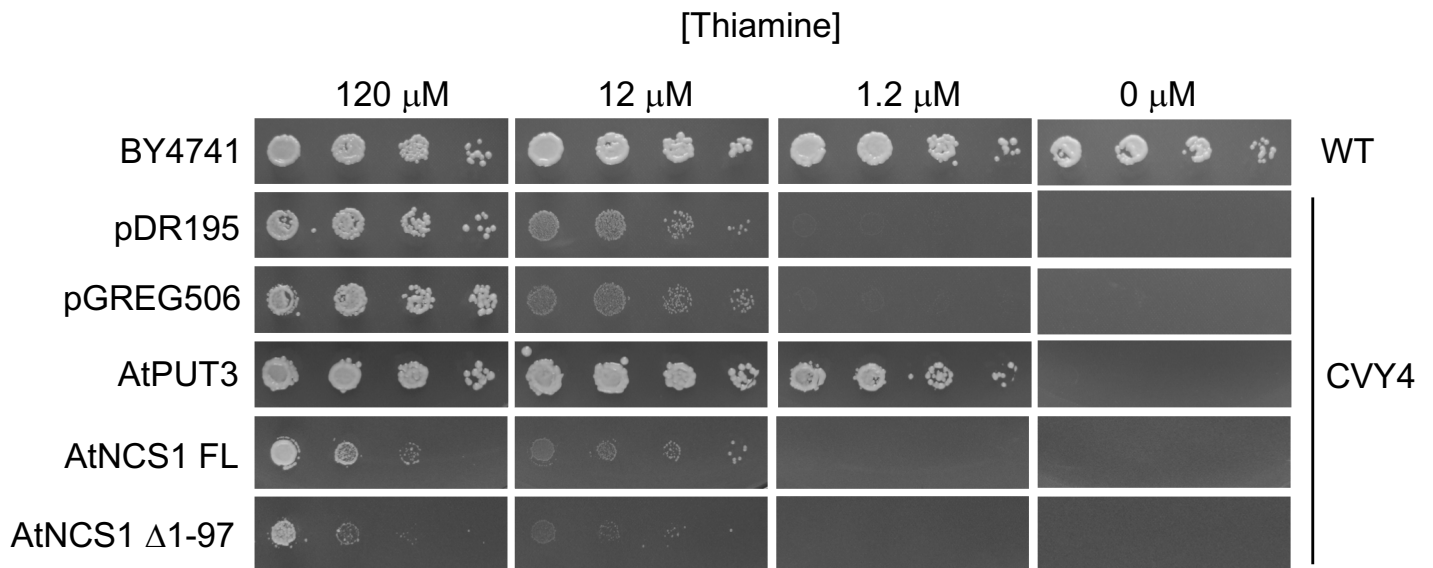

Growth of *Saccharomyces cerevisiae* (yeast) strain CVY4 (MATa *his3* $\Delta$ 1 *leu2* $\Delta$ 0 *lys2* $\Delta$ 0 *ura3* $\Delta$ 0 *thi4* $\Delta$ ::*his5*<sup>+</sup> *thi7* $\Delta$ ::*KanMX4* *thi71* $\Delta$ ::*LEU2* *thi72* $\Delta$ ::*LYS2*) that is impaired in biosynthesis and transport of thiamine in the presence of either the empty vector pDR195, or the empty vector pGREG506, or *Arabidopsis thaliana* PUT3 (thiamine transporter, AtPUT3 in pGREG506), or *Arabidopsis thaliana* NCS1 full length in pDR195 (AtNCS1 FL) or AtNCS1 in pGREG506 missing residues 1-97 from the N terminus (AtNCS1  $\Delta$ 1-97). Pictures were captured after 3 days of growth on synthetic dextrose medium supplemented with the indicated thiamine concentrations. The individual rows of yeast growth represent 10-fold serial dilutions of the strains as indicated.

## Supplementary Figure 4

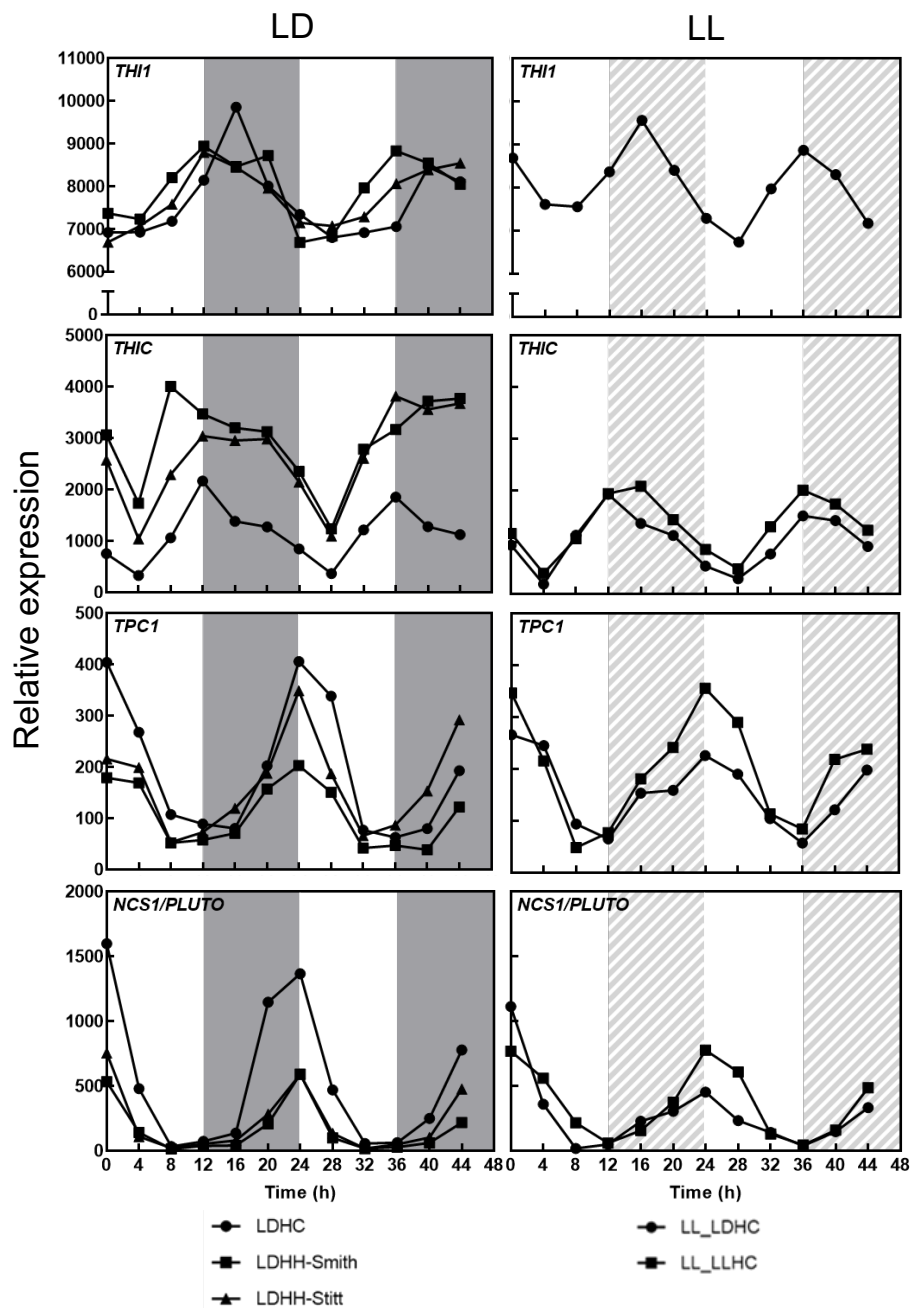

Transcript abundance of selected TDP biosynthesis and transport genes under equinoctial (12 hour light, 12 hour dark; LD) or continuous light (LL) conditions taken from Mockler TC et al 2007. In the case of LD, three sets of conditions were used to extract data: (LDHC), 7-day-old Col-0 seedling grown on ½ MS agar no sucrose; 12 hour light 100 µE at 22°C, 12 h dark at 12°C; (LDHH-Smith), 35-day-old Col-0 leaf grown on soil, 12 hour light 130 µE at 22°C and 12 h dark at 22°C; (LDHH-Stitt), 29-day-old Col-0 leaf grown on soil, 12 hour light 180 µE at 20°C, 12 hour dark at 20°C. In the case of LL, (LL-LDHC) two sets of conditions were used to extract data, 9-day-old Col-0 seedling grown on ½ MS agar no sucrose; 100 µE light at 22°C; (LL-LLHC) reported to be the same as LL-LDHC.

### Reference:

Mockler, T. C., Michael, T. P., Priest, H. D., Shen, R., Sullivan, C. M., et al THE DIURNAL PROJECT: Diurnal and circadian expression profiling, model-based pattern matching and promoter analysis. *Cold Spring Harb. Symp. Quant. Biol.* **72**, 353-363 (2007)

## Supplementary Tables



**Supplementary Table 1.** Ratio of antibiotic resistant (<sup>R</sup>) to sensitive (<sup>S</sup>) (Sulf<sup>R</sup>:Sulf<sup>S</sup>, Basta<sup>R</sup>:Basta<sup>S</sup>, Sulf<sup>R</sup> Basta<sup>R</sup>:Sulf<sup>S</sup> Basta<sup>S</sup>) for the F1 progeny of self-fertilized *Arabidopsis* *TPC1/tpc1.1* x *TPC2/tpc2.1* plants. Chi-squared ( $\chi^2$ ) p-values were calculated for the hypothesized segregation ratio from the tested ratio (p < 0.05, represented as \*; not significant, ns). Sulf, refers to sulfadiazine; Basta, refers to phosphinotricin.

|                               | Sulf <sup>R</sup> | Sulf <sup>S</sup> | Ratio tested | $\chi^2$ p-value | Basta <sup>R</sup> | Basta <sup>S</sup> | Ratio tested | $\chi^2$ p-value | Sulf <sup>R</sup> | Basta <sup>R</sup> | Sulf <sup>S</sup> | Basta <sup>S</sup> | Ratio tested | $\chi^2$ p-value |
|-------------------------------|-------------------|-------------------|--------------|------------------|--------------------|--------------------|--------------|------------------|-------------------|--------------------|-------------------|--------------------|--------------|------------------|
| <i>tpc1.1</i> x <i>tpc2.1</i> | 462               | 224               | 3:1<br>2:1   | *<br>ns          | 626                | 206                | 3:1          | ns               | 577               |                    | 425               |                    | 9:7          | ns               |
| <i>tpc2.1</i> x <i>tpc1.1</i> | 416               | 227               | 3:1<br>2:1   | *<br>ns          | 430                | 129                | 3:1          | ns               | 348               |                    | 314               |                    | 9:7          | ns               |

**Supplementary Table 2.** List of oligonucleotide sequences used in this study.

YFP refers to Yellow Fluorescent Protein. IR and IS are Intron Retained and Intron Spliced, respectively. Sc refers to primers used for yeast (*Saccharomyces cerevisiae*) studies.

| Gene target     | Locus ID  | Direction | Sequence (5' – 3')                                         |
|-----------------|-----------|-----------|------------------------------------------------------------|
| <i>CCA1</i>     | At2g46830 | Forward   | GCACTTTCCGCGAGTTCTTG                                       |
| <i>CCA1</i>     | At2g46830 | Reverse   | TGACTCCTTTCTTACCCTGTTATTCTG                                |
| <i>LUC-IR</i>   | -         | Forward   | CCGTATAAGTCGACAAGGCAAAT                                    |
| <i>LUC-IS</i>   | -         | Reverse   | CAAGCACCCCAACAGTTTGT                                       |
| <i>NCS1qPCR</i> | At5g03555 | Forward   | CGTGTTTCAGCCATGGAGATTGC                                    |
| <i>NCS1qPCR</i> | At5g03555 | Reverse   | AAGCGCTGAGTACCCTATGAGC                                     |
| <i>NCS1-YFP</i> | At5g03555 | Forward   | AAAAAGCAGGCTTGATGGTCTCCAATTGCTTAAG                         |
| <i>NCS1-YFP</i> | At5g03555 | Reverse   | AGAAAGCTGGGTACAAAAGCGGATGTGAAG                             |
| NCS1 FL (Sc)    | At5g03555 | Forward   | GAATTCGATATCAAGCTTATCGATACCGTCGACAATGGTCTCCA ATTGCTTAAG CC |
| NCS1 FL (Sc)    | At5g03555 | Reverse   | GCGTGACATAACTAATTACATGACTCGAGGTCGACTTACAAAAGCGGATGTGAAGAAG |
| NCS1 Δ97 (Sc)   | At5g03555 | Forward   | GAATTCGATATCAAGCTTATCGATACCGTCGACAATGACCGGCTCAGAAATTAATGAC |
| <i>TH1</i>      | At1g22940 | Forward   | TGTTAAAGGTGGTGATCTTCCTG                                    |
| <i>TH1</i>      | At1g22940 | Reverse   | TCTTGTAGCTATGCGAGGAGAAC                                    |
| <i>TH2</i>      | At5g32470 | Forward   | GGGGTCTCATTGTGTCCTTTG                                      |
| <i>TH2</i>      | At5g32470 | Reverse   | CTCCCATCCAAGAGCGAATG                                       |
| <i>THI1</i>     | At5g54770 | Forward   | AATCTGTTAGTCCTGGTGGTGGT                                    |
| <i>THI1</i>     | At5g54770 | Reverse   | CAATCTCGTCAAGGAACAAGTG                                     |
| <i>THIC</i>     | At2g29630 | Forward   | CCATCTTTTGAAGAATGCTTTCCCT                                  |
| <i>THIC</i>     | At2g29630 | Reverse   | GAACACGACGAAAGGGAACCTT                                     |
| <i>THIC-IR</i>  | At2g29630 | Forward   | GCCTGTTGGACTATACCTGGATAAA                                  |
| <i>THIC-IR</i>  | At2g29630 | Reverse   | TGACTCAAATGAACAGACAACATAGATAGTT                            |
| <i>THIC-IS</i>  | At2g29630 | Forward   | CTTGGTGCCTGTTGGACTATAACC                                   |
| <i>THIC-IS</i>  | At2g29630 | Reverse   | TCAGGTTCAAAGGGACTTTCTCA                                    |
| <i>TPK1</i>     | At1g02880 | Forward   | TGCCTCATCCAACCTCCT                                         |
| <i>TPK1</i>     | At1g02880 | Reverse   | GTGTTGCTGAGATCCCATTG                                       |
| <i>TPK2</i>     | At2g44750 | Forward   | GAGAGTTCCAGACTCCAGAT                                       |

|              |           |         |                        |
|--------------|-----------|---------|------------------------|
| <i>TPK2</i>  | At2g44750 | Reverse | TGGAAGGAGTTGGATGAGAC   |
| <i>TPC1</i>  | At3g21390 | Forward | TATGCTGGTCTGCAGTTTG    |
| <i>TPC1</i>  | At3g21390 | Reverse | GCTTGATGAAGAAGATCGGT   |
| <i>TPC2</i>  | At5g48970 | Forward | AATATTGGCCTCACAAGGG    |
| <i>TPC2</i>  | At5g48970 | Reverse | CCTCTTATACCTCGAGACTG   |
| <i>UBC21</i> | At5g25760 | Forward | TAGCATTGATGGCTCATCCTGA |
| <i>UBC21</i> | At5g25760 | Reverse | TTGTGCCATTGAATTGAACCC  |
