# Supplementary material for: The coenzyme thiamine diphosphate displays a daily rhythm in the Arabidopsis nucleus
Source: PubMed Central journal article supplement (PMC7200797; doi:10.1038/s42003-020-0927-z), 2020-05-05
Supplement: 42003_2020_927_MOESM4_ESM.pdf [file 42003_2020_927_MOESM4_ESM.pdf]

## **Description of Additional Supplementary Files**

**File Name:** Supplementary Data 1

**Description:** contains the source data underlying plots shown in the main figures of this study.
